# Supplementary material for: Three dimensionally ordered mesoporous hydroxylated NixCo3−xO4 spinels for the oxygen evolution reaction: on the hydroxyl-induced surface restructuring effect
Source: Royal Society of Chemistry journal article supplement (doi:10.1039/c7ta00185a), 2017-01-01
Supplement: c7ta00185a1.pdf [file c7ta00185a1.pdf]

## Supporting Information

### Three dimensionally ordered mesoporous hydroxylated $\text{Ni}_x\text{Co}_{3-x}\text{O}_4$ spinels for oxygen evolution reaction: on the hydroxyl-induced surface restructuring effect.

I. Abidat, C. Morais, C. Comminges\*, C. Canaff, J. Rousseau, N. Guignard, T.W. Napporn, A. Habrioux\*, K. B. Kokoh.

Author information : aurelien.habrioux@univ-poitiers.fr; clement.comminges@univ-poitiers.fr

Université de Poitiers, IC2MP CNRS UMR 7285, 4 rue Michel Brunet B27, TSA51106, 86073 Poitiers, Cedex 9, France

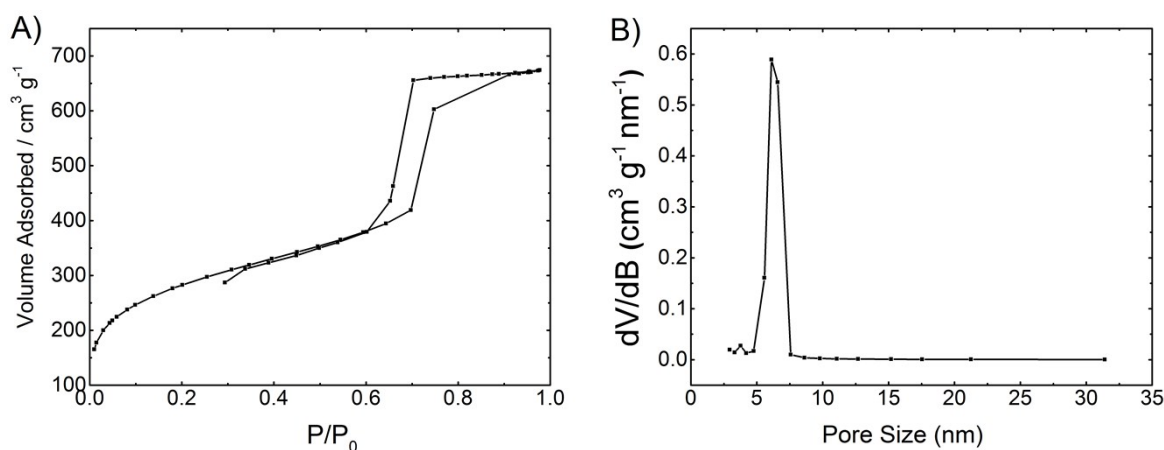

**Figure S1.**  $\text{N}_2$  adsorption-desorption isotherm (A) and corresponding pore size distribution curve of KIT-6 silica template (B).

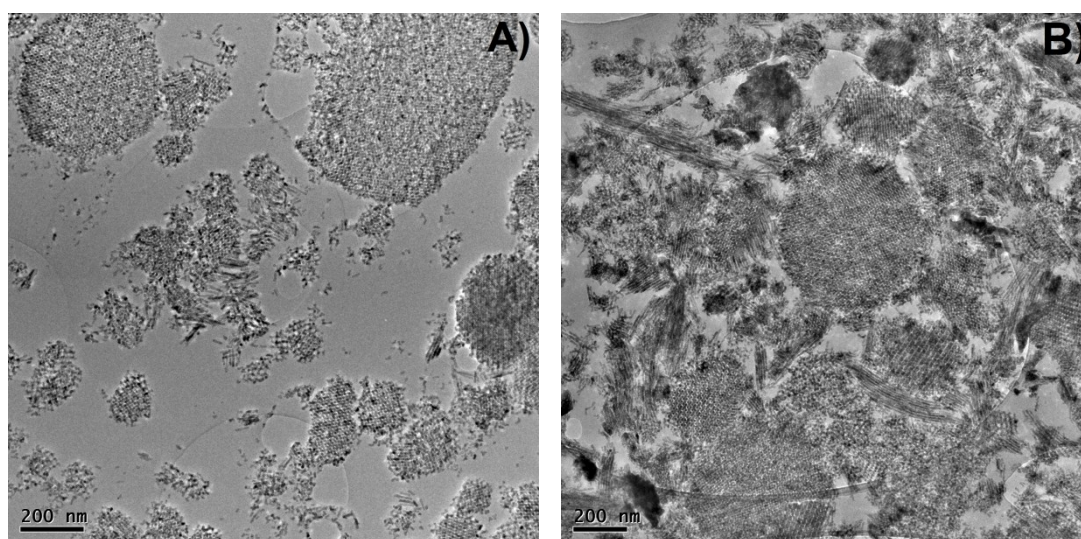

**Figure S2.** Low-magnification TEM images of as-prepared spinel oxides (A)  $\text{Ni}_{0.18}\text{Co}_{2.82}\text{O}_4$ , (B)  $\text{Ni}_{1.00}\text{Co}_{2.00}\text{O}_4$ .

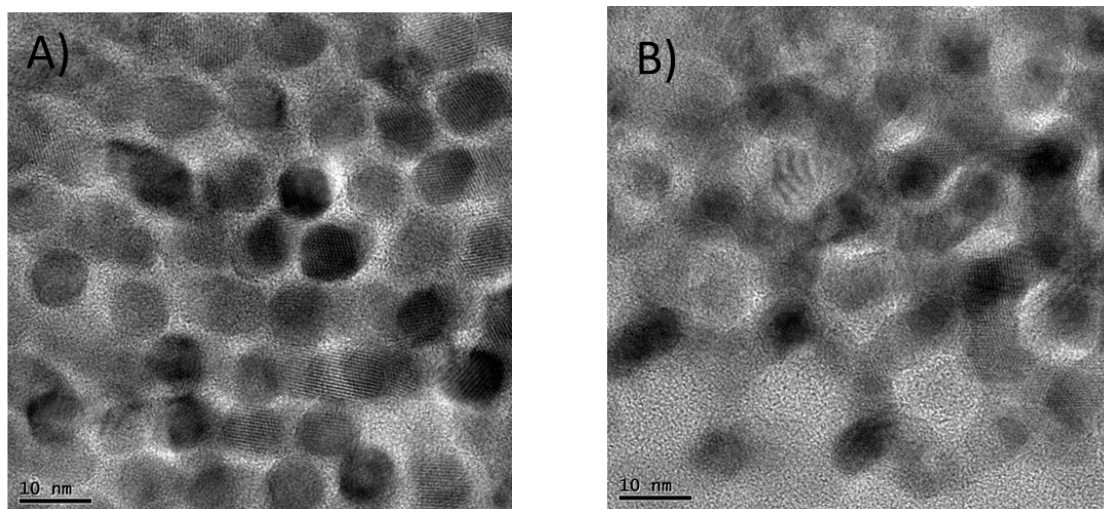

**Figure S3.** HRTEM images of  $\text{Co}_3\text{O}_4$  and  $\text{Ni}_{0.6}\text{Co}_{2.4}\text{O}_4$  catalysts

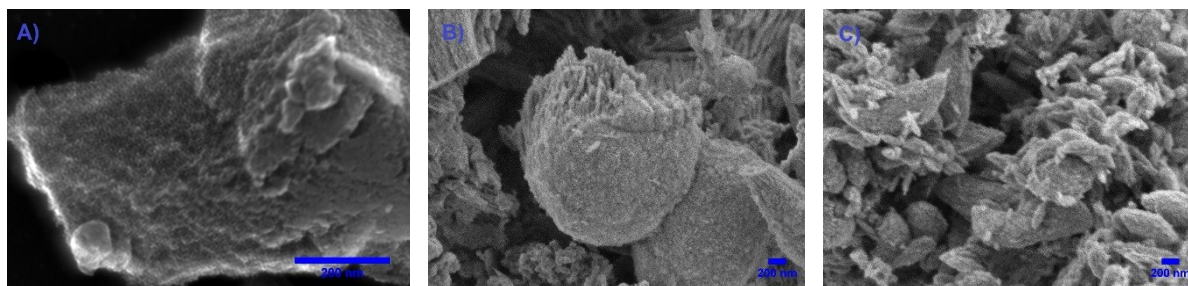

**Figure S4.** SEM images of (A) KIT-6, (B)  $\text{Co}_3\text{O}_4$  and (C)  $\text{Ni}_{0.6}\text{Co}_{2.4}\text{O}_4$  replicas

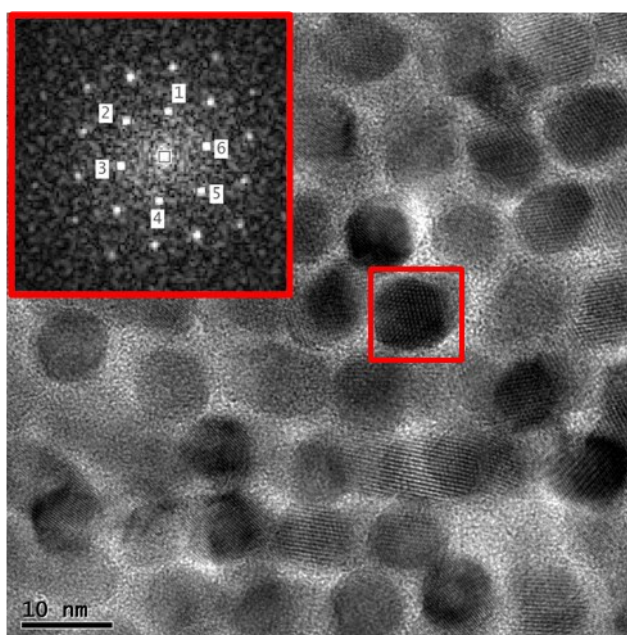

**Figure S5:** HRTEM image and Fourier transform of a selected area obtained on a  $\text{Co}_3\text{O}_4$  single crystal. Zone axis :  $\langle 0, 1, -1 \rangle$ .

**Table S6:** d spacing corresponding to the spots indexed on Figure S5.

| Spot number | d spacing (nm) |
|-------------|----------------|
| 1           | 0.4635         |
| 2           | 0.4017         |
| 3           | 0.4642         |
| 4           | 0.4635         |
| 5           | 0.4017         |
| 6           | 0.4642         |

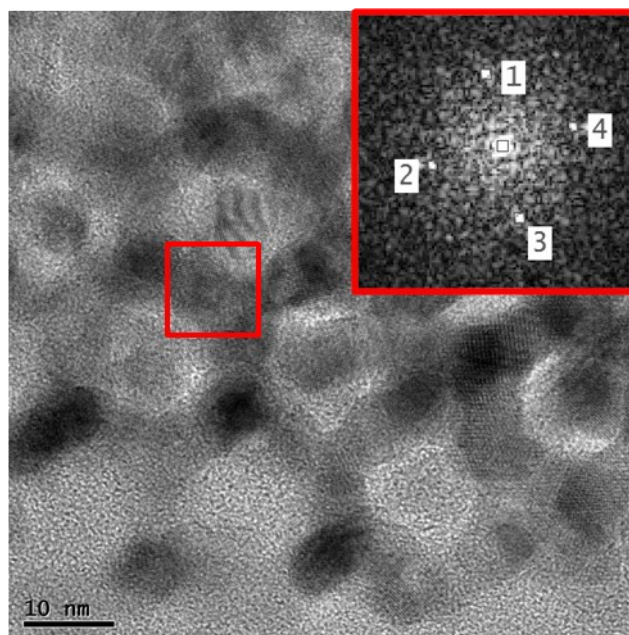

**Figure S7:** HRTEM image and Fourier transform of a selected area obtained on a NiCo<sub>2</sub>O<sub>4</sub> single crystal. Zone axis:  $\langle 1, 0, 0 \rangle$ .

**Table S8:** d spacing corresponding to the spots indexed on Figure S6.

| Spot number | d spacing (nm) |
|-------------|----------------|
| 1           | 0.2815         |
| 2           | 0.2851         |
| 3           | 0.2815         |
| 4           | 0.2851         |



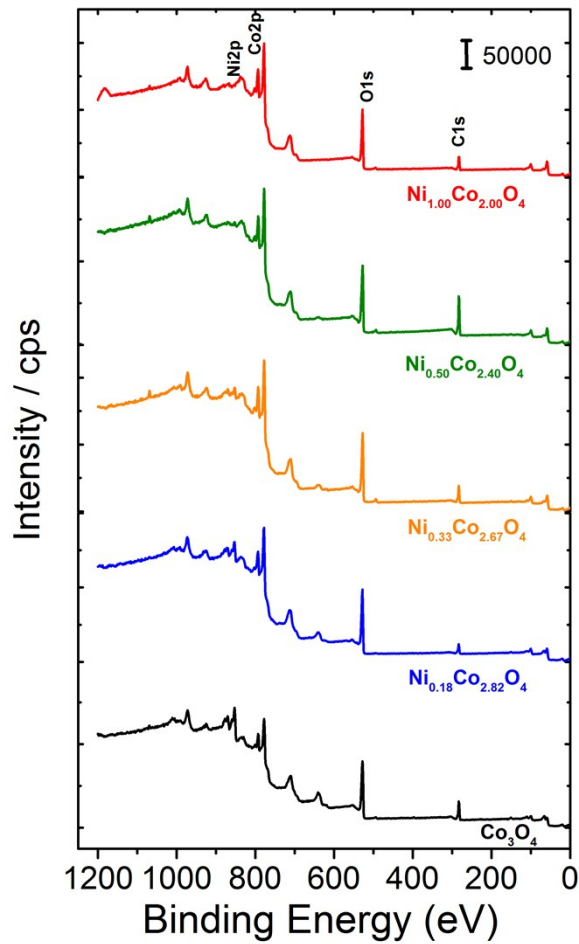

**Figure S9.** XPS survey spectra for the different catalysts.

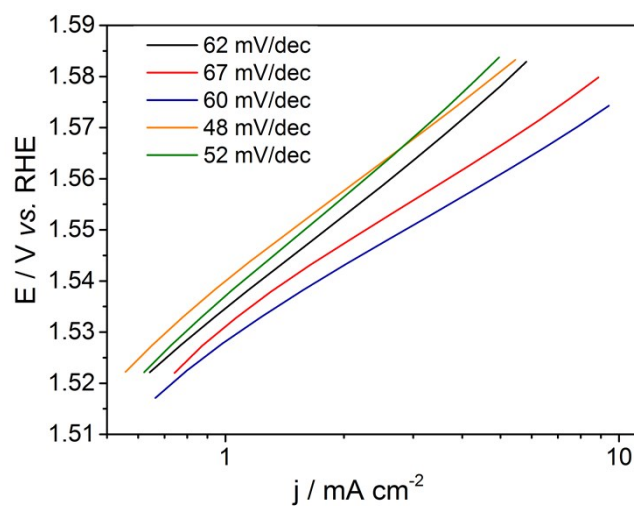

**Figure S10.** Tafel plots for the different catalysts.  $\text{Co}_3\text{O}_4$  (black solid line),  $\text{Ni}_{0.18}\text{Co}_{2.82}\text{O}_4$  (red),  $\text{Ni}_{0.33}\text{Co}_{2.67}\text{O}_4$  (blue),  $\text{Ni}_{0.60}\text{Co}_{2.40}\text{O}_4$  (orange),  $\text{Ni}_{1.00}\text{Co}_{2.00}\text{O}_4$  (green).

**Table S11.** EIS fitting parameters for Ni<sub>0.60</sub>Co<sub>2.40</sub>O<sub>4</sub> obtained from the equivalent circuit presented on Scheme 1.

| at 1.3V<br>vs. RHE | R <sub>cell</sub> / Ω | C <sub>dl</sub> / F   | p <sub>dl</sub> | R <sub>ct</sub> / Ω | C <sub>ads</sub> / F  | P <sub>ads</sub> | k <sub>ET</sub> / s <sup>-1</sup> | D    |
|--------------------|-----------------------|-----------------------|-----------------|---------------------|-----------------------|------------------|-----------------------------------|------|
| Before<br>cycling  | 7.83                  | 1.13 10 <sup>-4</sup> | 0.621           | 38.6                | 1.59 10 <sup>-3</sup> | 0.930            | 8.14                              | 2.61 |
| After<br>cycling   | 7.48                  | 3.24 10 <sup>-5</sup> | 0.693           | 91.1                | 2.34 10 <sup>-3</sup> | 0.823            | 2.34                              | 2.44 |
